# Supplementary material for: Amorphous/amorphous Ni–P/Ni(OH)2 heterostructure nanotubes for an efficient alkaline hydrogen evolution reaction
Source: Royal Society of Chemistry journal article supplement (doi:10.1039/d1ta01062j), 2021-01-01
Supplement: d1ta01062j1.pdf [file d1ta01062j1.pdf]

## Supporting Information

### Amorphous/amorphous Ni-P/Ni(OH)<sub>2</sub> Heterostructure Nanotubes for Efficient Alkaline Hydrogen Evolution Reaction

Fuzhen Zhao<sup>a</sup>, Huicong Liu<sup>a</sup>, Houyu Zhu,<sup>b</sup> Xiaoyu Jiang<sup>c,\*</sup>, Liqun Zhu<sup>a</sup>, Weiping Li<sup>a</sup>, Haining Chen<sup>a,\*</sup>

<sup>a</sup> School of Materials Science and Engineering, Beihang University, No. 37 Xueyuan Road, Haidian District, Beijing 100191, China

<sup>b</sup> School of Materials Science and Engineering, China University of Petroleum (East China), Qingdao, Shandong 266580, P. R. China

<sup>c</sup> Department of Information Communication, Army Academy of Armored Forces, Beijing 100072, China

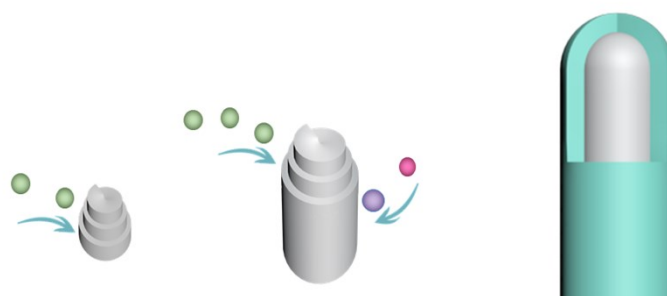

**Figure S1.** Schematic illustration of the axial screw dislocation-driven growth mechanism of Zn@Ni-P NWs.

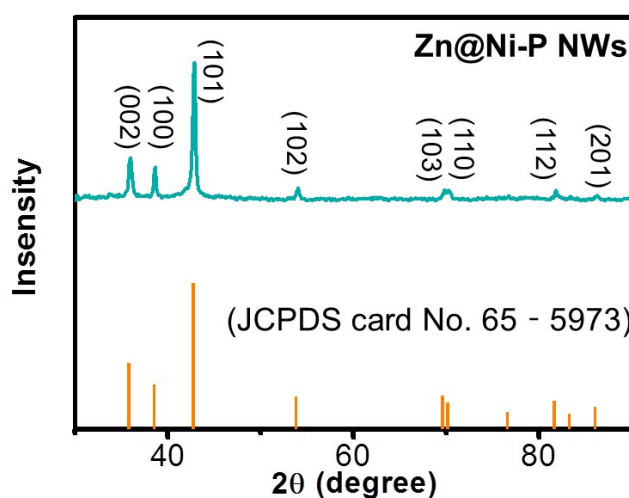

**Figure S2.** XRD pattern of Zn@Ni-P NWs and the JCPDS card of Zn.

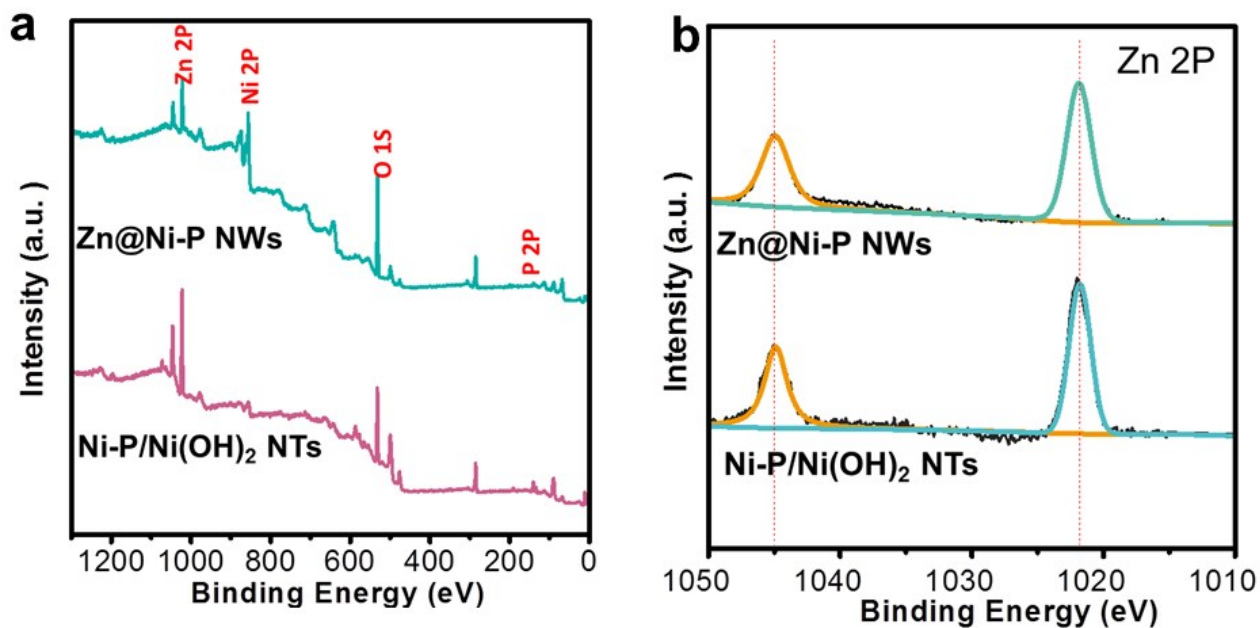

Figure S3. XPS characterization comparison for peaks shift. (a) survey spectra, (b) Zn 2P spectra.

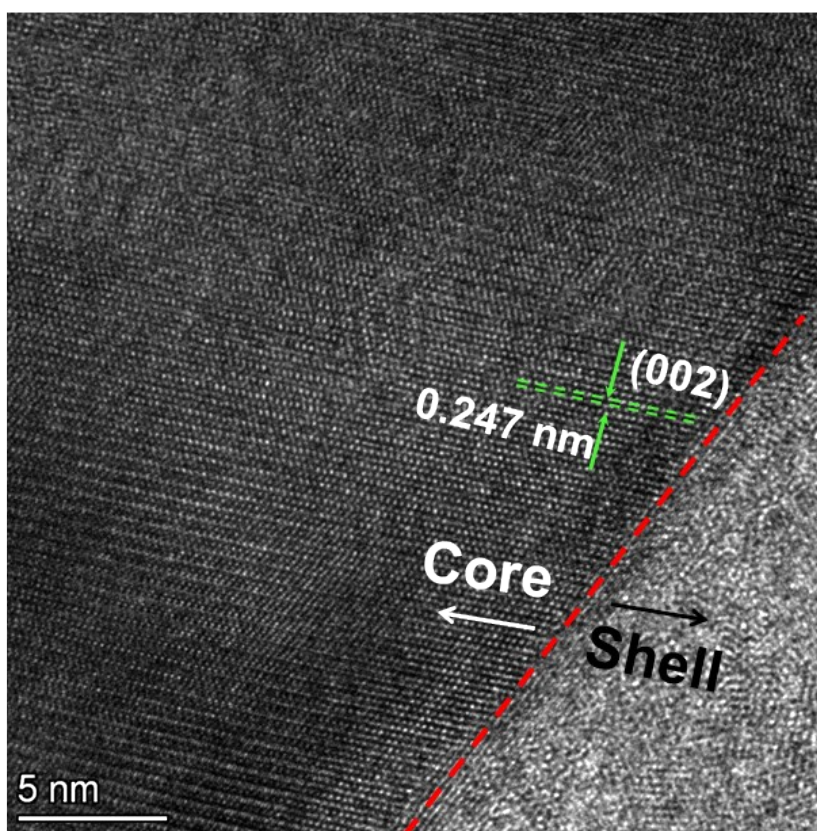

Figure S4. HRTEM image of a core-shell Zn@Ni-P NW.

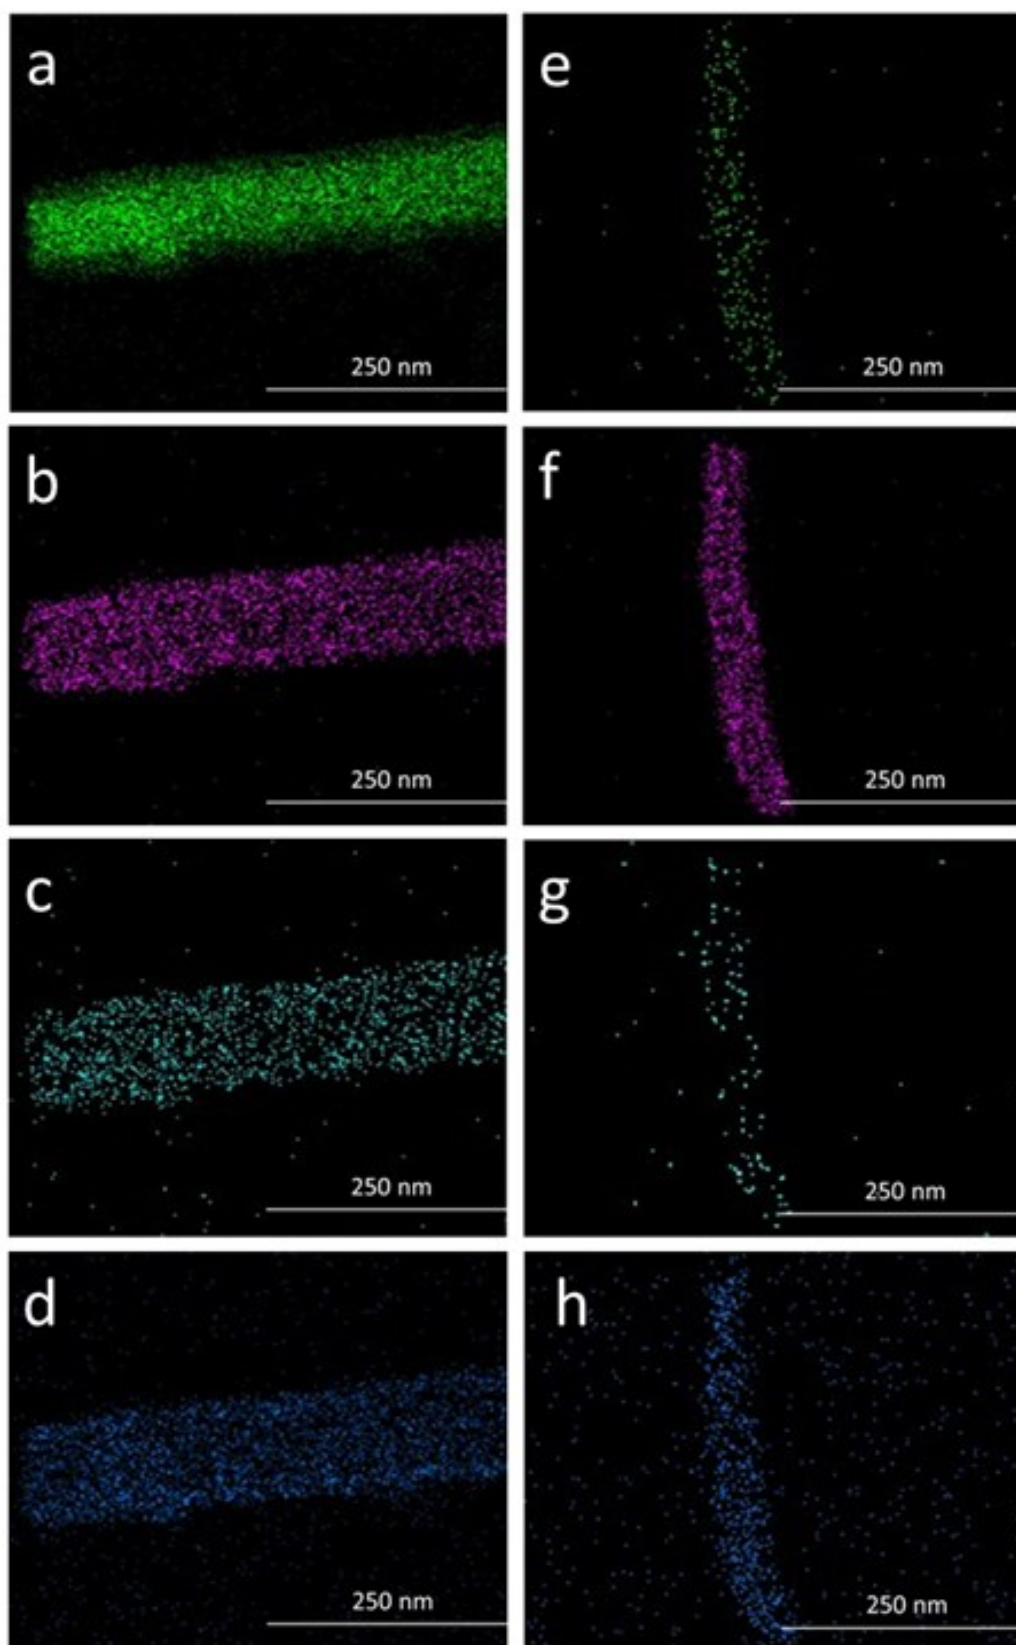

**Figure S5.** EDS elemental mapping images for Zn (a, e), Ni (b, f), P (c, g) and O (d, h) of Zn@Ni-P NWs (a, b, c and d) and Ni-P/Ni(OH)<sub>2</sub> NTs (e, f, g and h).

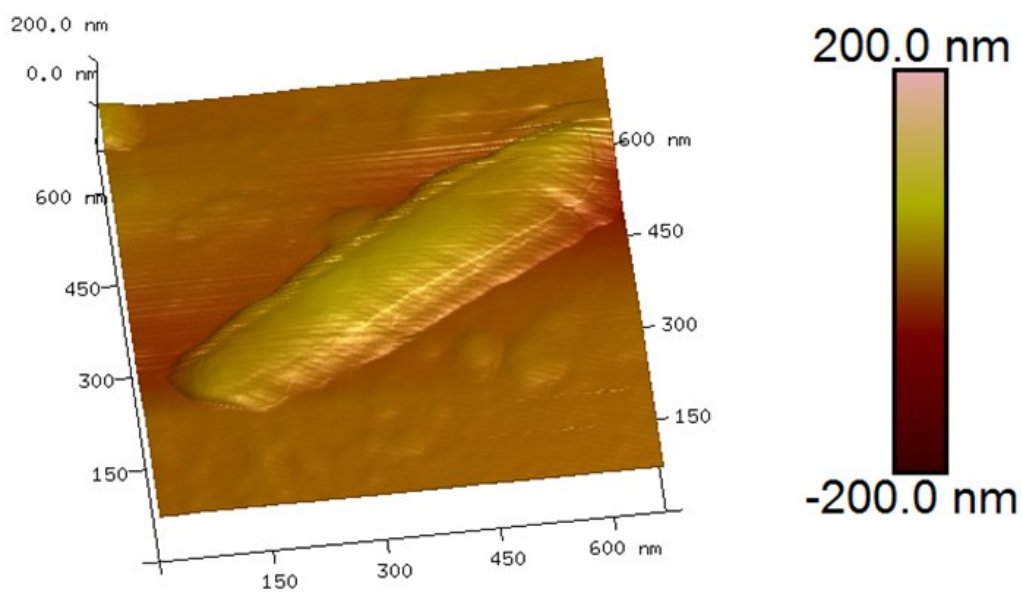

**Figure S6.** AFM image of a Zn@Ni-P NW.

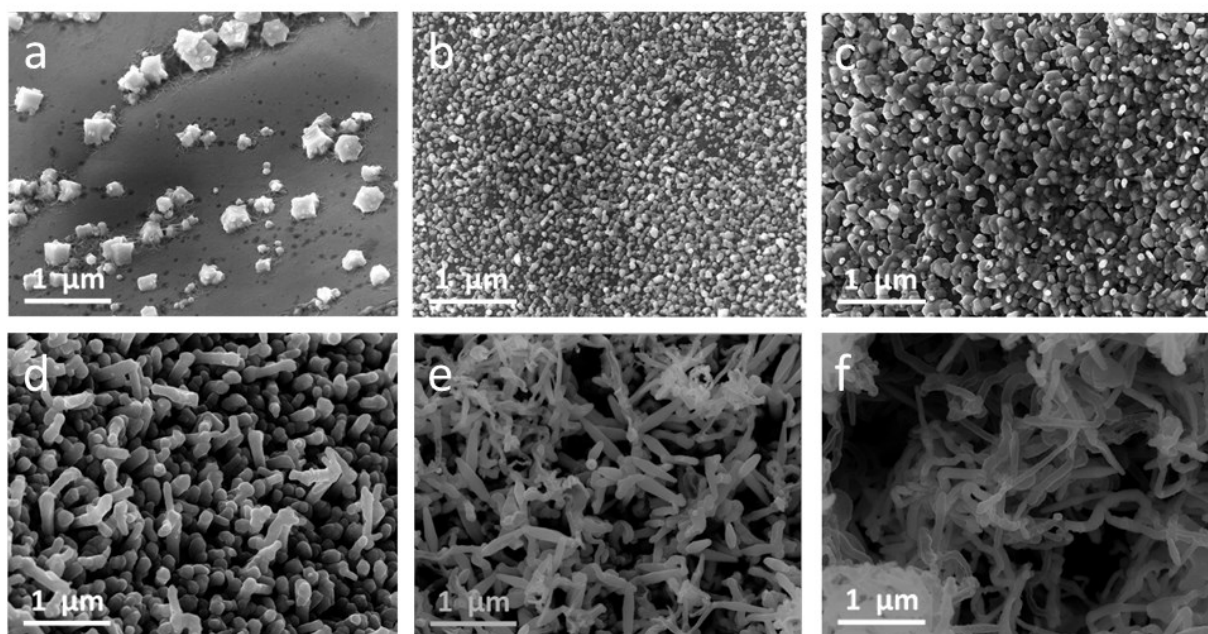

**Figure S7.** SEM images of the Zn@Ni-P NWs obtained at different growth time. (a) 5 s, (b) 10 s, (c) 30 s, (d) 1 min, (e) 5 min and (f) 15 min.



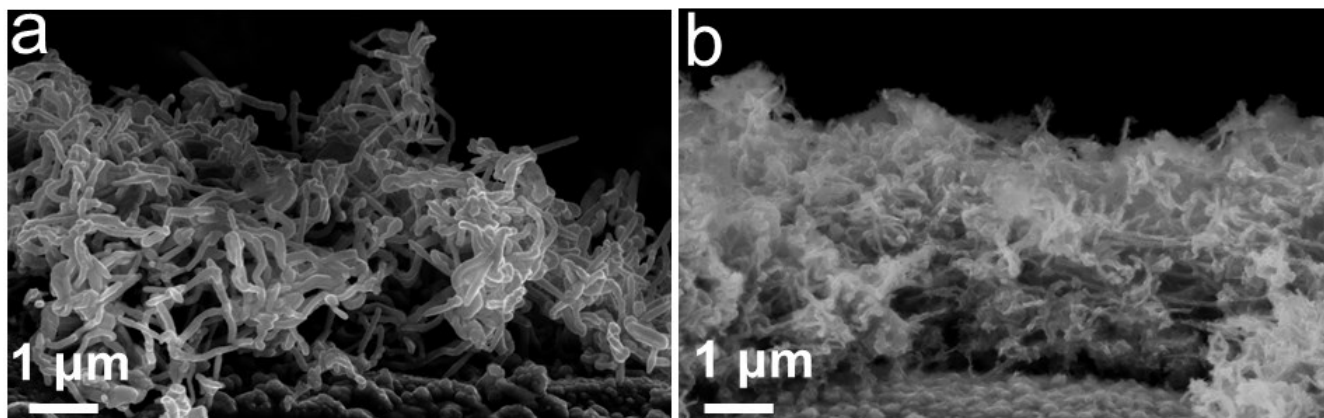

**Figure S8.** Cross-sectional SEM images of (a) Zn@Ni-P NWs, and (b) Ni-P/Ni(OH)<sub>2</sub> NTs.

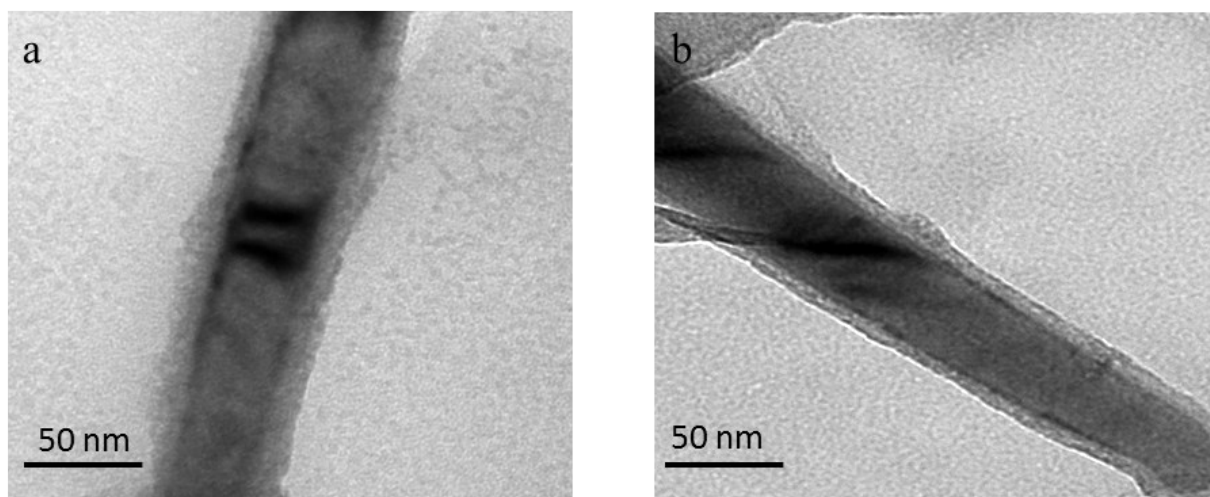

**Figure S9.** Zero-beam bright field TEM images showing a pair of twist contours. (a) and (b) are two different Zn@Ni-P NWs.

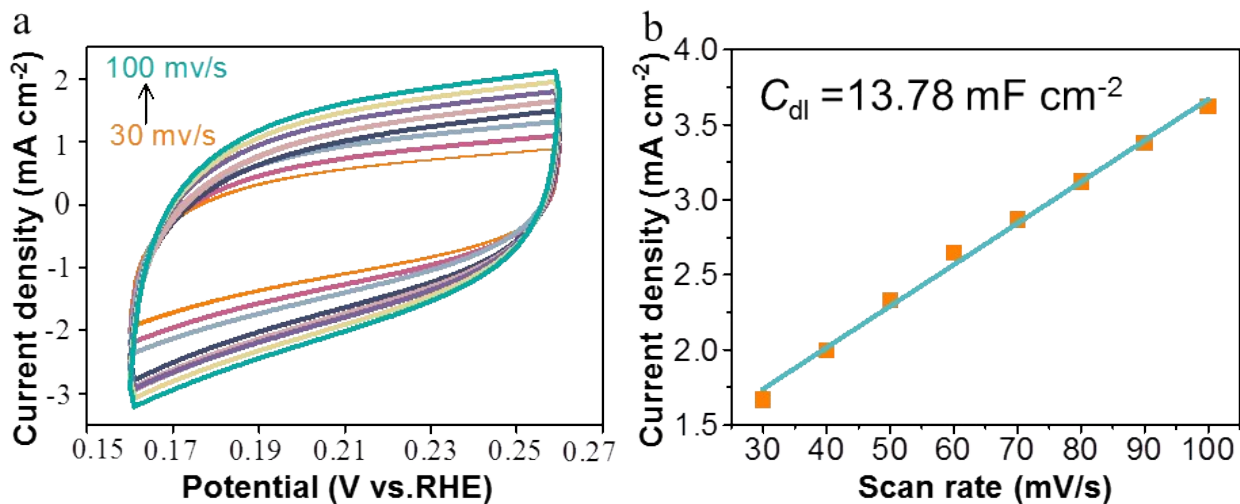

**Figure S10.** Electrochemical surface area (ECSA) measurements of of the Ni-P/Ni(OH)<sub>2</sub> NTs in the 1 M KOH. (a) CV curves of the Ni-P/Ni(OH)<sub>2</sub> NTs with different scan rates in the non-faradic reaction range, (b) current differences plotted against scan rates. The linear slope is two times the double-layer capacitance  $C_{dl}$ .

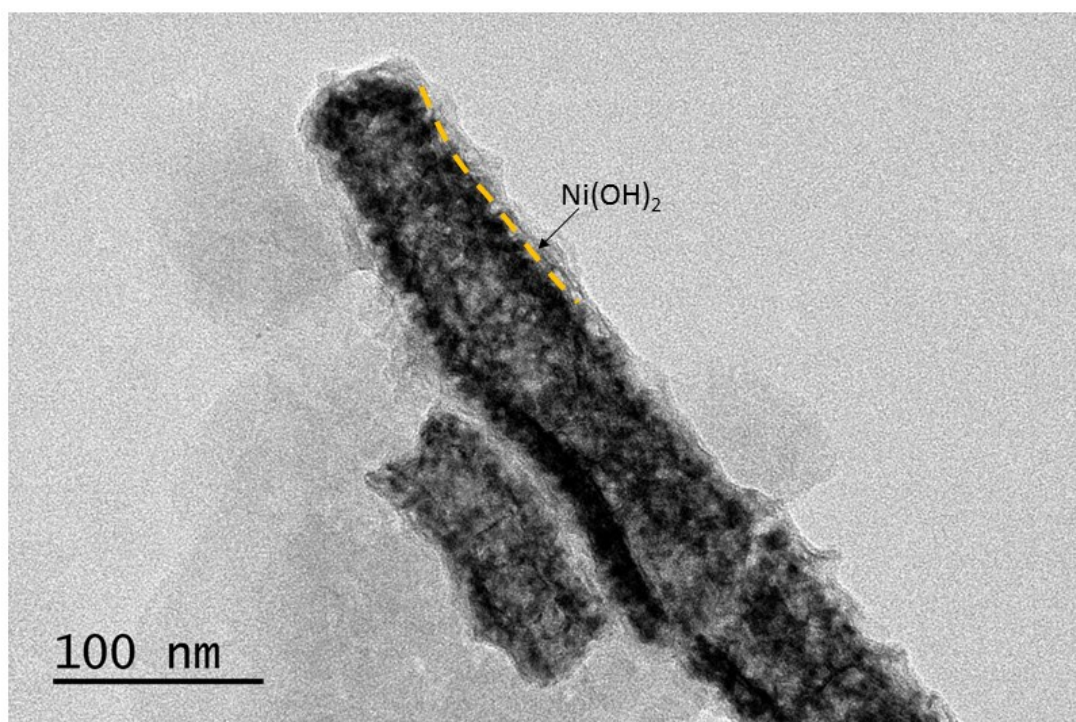

**Figure S11.** TEM image of the Ni-P/Ni(OH)<sub>2</sub> NTs.

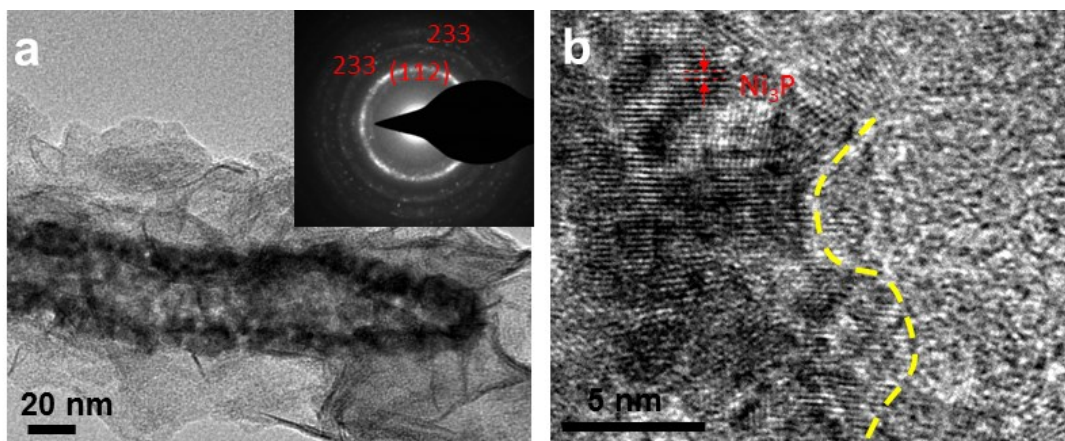

**Figure S12.** (a) TEM image of the crystalline/amorphous Ni-P/Ni(OH)<sub>2</sub> NTs . Insert is the SAED pattern; (b) HRTEM image of the crystalline/amorphous Ni-P/Ni(OH)<sub>2</sub> NTs.

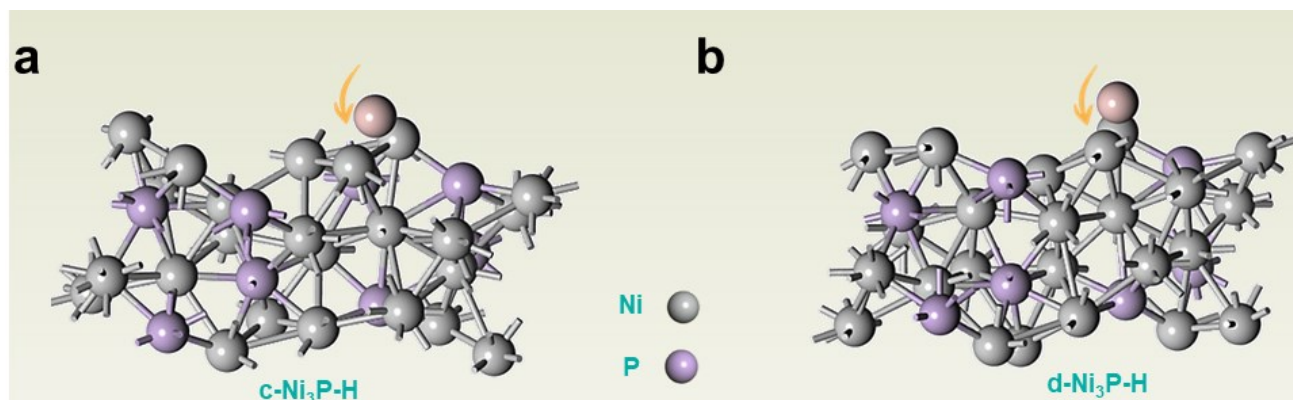

**Figure S13.** H\* adsorption models of (a) c-Ni<sub>3</sub>P, and (b) d-Ni<sub>3</sub>P.

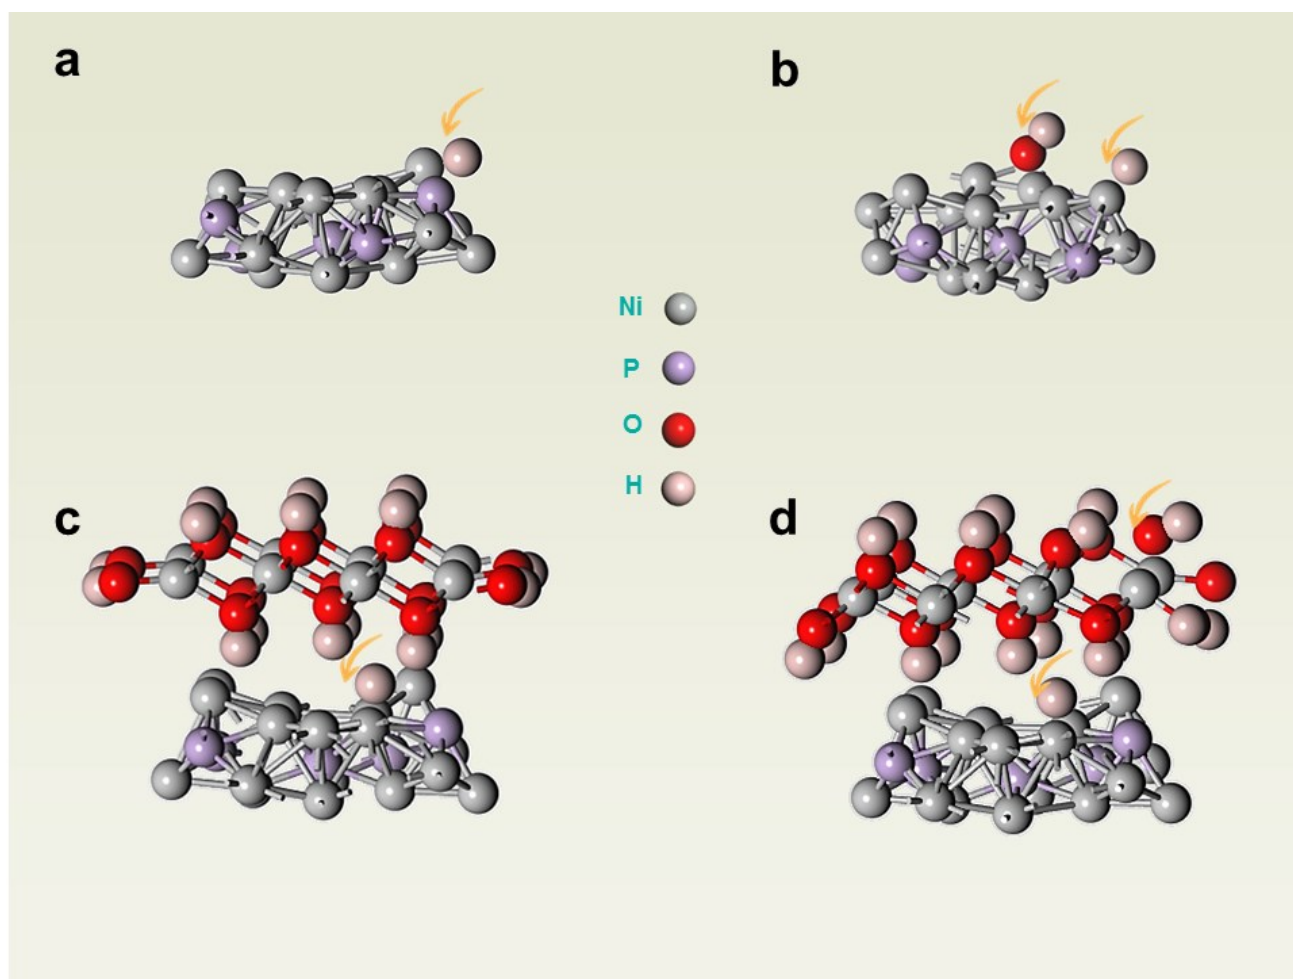

**Figure S14.** H\* adsorption models of (a) amorphous Ni-P, and (c) heterostructure. OH-H\* adsorption models of (b) amorphous Ni-P, and (d) heterostructure.



**Table S1.** Comparison of the overpotential of various transition metal phosphides in 1 M KOH at the current density of 10 mA cm<sup>-2</sup>

| HER electrocatalysts                  | $\eta_{10}$ (mV) | References |
|---------------------------------------|------------------|------------|
| Ni <sub>3</sub> P <sub>4</sub>        | -47              | 1          |
| This work                             | -54.7            |            |
| NiCoP <sub>x</sub> NW                 | -58              | 2          |
| MoP@RGO                               | -70              | 3          |
| CoP/CNTs                              | -76              | 4          |
| Mo-Ni <sub>2</sub> P NW               | -78              | 5          |
| P-Mo <sub>2</sub> C@NC                | -83              | 6          |
| MoP/CNTs                              | -86              | 7          |
| Ni <sub>0.5</sub> Co <sub>0.5</sub> P | -87              | 8          |
| CoP <sub>2</sub> /RGO                 | -88              | 9          |
| CO-P                                  | -94              | 10         |
| Mn-Ni <sub>2</sub> P NS               | -103             | 11         |
| Cu <sub>3</sub> P NS                  | -105             | 12         |
| P-Co <sub>3</sub> O <sub>4</sub>      | -120             | 13         |
| CoP <sub>3</sub> NSs                  | -121             | 14         |
| MoP/C                                 | -125             | 15         |
| Co <sub>2</sub> P@NPC                 | -129             | 16         |
| Cu <sub>3</sub> P MSs                 | -130             | 17         |
| Ni <sub>1.5</sub> Fe <sub>0.5</sub> P | -158             | 18         |
| CoP/C                                 | -163             | 19         |
| Co/CoP-NC                             | -180             | 20         |

**Table S2.** Thermodynamic data used in the calculations of Gibbs free energy.

|                                  | E(eV)       | Corrected value for G | G           |
|----------------------------------|-------------|-----------------------|-------------|
| H <sub>2</sub> O                 | -14.218518  | 0.083711              | -14.134807  |
| H <sub>2</sub>                   | -6.77       | -0.047005             | -6.817005   |
| c-Ni <sub>3</sub> P              | -183.32363  | 0                     | -183.32363  |
| c-Ni <sub>3</sub> P-H            | -187.433554 | 0.164639 eV           | -187.268915 |
| d-Ni <sub>3</sub> P              | -175.46976  | 0                     | -175.46976  |
| d-Ni <sub>3</sub> P-H            | 179.45810   | 0.163664              | -179.294436 |
| Amorphous Ni <sub>3</sub> P      | -111.96887  | 0                     | -111.96887  |
| Amorphous Ni <sub>3</sub> P-H    | -115.58735  | 0.204564              | -115.382786 |
| Amorphous Ni <sub>3</sub> P-OH-H | -126.31185  | 0.504250              | -125.8076   |
| Heterstructure                   | -322.25478  | 0                     | -322.25478  |
| Heterstructure-H                 | -325.74428  | 0.176825              | -325.567455 |
| Heterstructure-OH-H              | 337.00965   | 0.501006              | 337.510656  |

## References

- 1 H. Wang, Y. Xie, H. Cao, Y. Li, L. Li, Z. Xu, X. Wang, N. Xiong and K. Pan, *ChemSusChem*, 2017, **10**, 4899-4908.
- 2 R. Zhang, X. Wang, S. Yu, T. Wen, X. Zhu, F. Yang, X. Sun, X. Wang and W. Hu, *Adv. Mater.*, 2017, **29**, 1605502.
- 3 G. Zhang, G. Wang, Y. Liu, H. Liu, J. Qu and J. Li, *J. Am. Chem. Soc.*, 2016, **138**, 14686-14693.
- 4 X. Zhang, S. Zhu, L. Xia, C. Si and F. Qu, *Chem. Commun.*, 2018, **54**, 1201-1204.
- 5 Y. Sun, L. Hang, Q. Shen, T. Zhang, H. Li, X. Zhang, X. Lyu and Y. Li, *Nanoscale*, 2017, **9**, 16674-16679.
- 6 Y. Gang, X. Feng, S. U. Khan, L. Xiao, W. Xi, H. Tan, Y. Ma, L. Zhang and Y. Li, *Chemistry – An Asian Journal*, 2018, **13**, 158-163.
- 7 X. Zhang, X. Yu, L. Zhang, F. Zhou, Y. Liang and R. Wang, *Adv. Funct. Mater.*, 2018, **28**, 1706523.
- 8 Y. Li, Z. Jiang, J. Huang, X. Zhang and J. Chen, *Electrochim. Acta*, 2017, **249**, 301-307.
- 9 J. Wang, W. Yang and J. Liu, *Journal of Materials Chemistry A*, 2016, **4**, 4686-4690.
- 10 N. Jiang, B. You, M. Sheng and Y. Sun, *Angew. Chem. Int. Ed.*, 2015, **54**, 6251-6254.
- 11 Y. Zhang, Y. Liu, M. Ma, X. Ren, Z. Liu, G. Du, A. M. Asiri and X. Sun, *Chem. Commun.*, 2017, **53**, 11048-11050.
- 12 A. Han, H. Zhang, R. Yuan, H. Ji and P. Du, *ACS Appl. Mater. Interfaces*, 2017, **9**, 2240-2248.
- 13 Z. Xiao, Y. Wang, Y. C. Huang, Z. Wei, C. L. Dong, J. Ma, S. Shen, Y. Li and S. Wang, *Energy & Environmental Science*, 2017, **10**, 2563-2569.
- 14 T. Wu, M. Pi, X. Wang, W. Guo, D. Zhang and S. Chen, *J. Alloys Compd.*, 2017, **729**, 203-209.
- 15 X. Liu, L. Zhang, M. Li and X. Hu, *Chem. Commun.*, 2018, **54**, 2502-2505.
- 16 C. Zhang, Z. Pu, I. Amiin, Y. Zhao and J. Zhu, *Nanoscale Cambridge*, 2018, **10**, 2902-2907.
- 17 J. Hao, W. Yang, Z. Huang and C. Zhang, *Advanced Materials Interfaces*, 2016, **3**, 1600236.
- 18 H. Huang, C. Yu, C. Zhao, X. Han, J. Yang, Z. Liu, S. Li, M. Zhang and J. Qiu, *Nano Energy*, 2017, **34**, 472-480.
- 19 L. Yao, N. Zhang, Y. Wang, Y. Ni, D. Yan and C. Hu, *J. Power Sources*, 2018, **374**, 142-148.
- 20 Y. Hao, Y. Xu, W. Liu and X. Sun, *Materials Horizons*, 2018, **5**, 108-115.
